# Supplementary material
Source: MDPI journal article supplement (https://www.mdpi.com/2073-4441/15/21/3789)
Supplement: s1 [file s1 › water-2658700-supplementary.pdf]

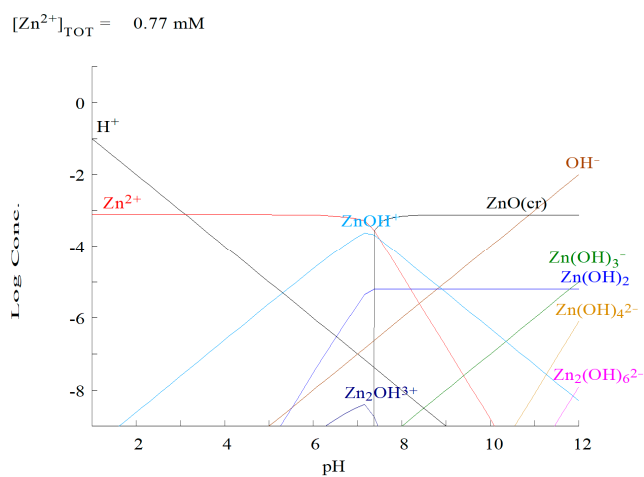

Figure S1. Speciation diagram and effect of initial solution pH on the Zn adsorption

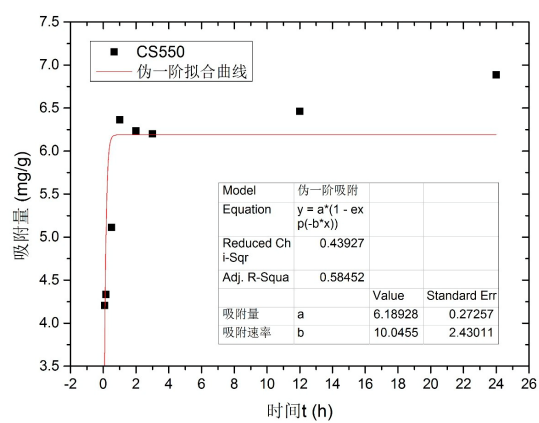

Figure S2. The fitting of pseudo-first-order model for Zn adsorption onto CS500.
